# Supplementary material for: Directed migration shapes cooperation in spatial ecological public goods games
Source: PubMed Central journal article supplement (PMC6687102; doi:10.1371/journal.pcbi.1006948), 2019-08-08
Supplement: pcbi.1006948.s001.pdf [file pcbi.1006948.s001.pdf]

## Specifics of Ecological Public Goods Dynamics

As introduced in the main text, the interplay of ecological and evolutionary dynamics is modelled by

$$\partial_t u = u [w(b + f_C) - d] \quad (\text{S1.1a})$$

$$\partial_t v = \underbrace{v [w(b + f_D) - d]}_{\text{ecological dynamics}}. \quad (\text{S1.1b})$$

where  $w = 1 - u - v$  reflects reproductive opportunities that diminish for increasing population densities [1]. While the death rate,  $d$ , remains constant, the effective birth rates of cooperators,  $w(b + f_C)$ , and defectors,  $w(b + f_D)$ , are determined by the average payoffs

$$f_D = r \frac{u}{u + v} \left( 1 - \frac{1 - w^N}{(u + v)N} \right) c, \quad (\text{S1.2a})$$

$$f_C = f_D - \left( 1 + (r - 1)w^{N-1} - r \frac{1 - w^N}{(u + v)N} \right) c \quad (\text{S1.2b})$$

plus the baseline birth rate,  $b$ , because in the limit  $v \rightarrow 1$  the payoff  $f_C$  can become negative, which is biologically not meaningful [1]. The ecological dynamics results in variable interaction group sizes with an effective, expected group size of  $S = (u + v)N$ . Thus, as long as  $S > r$ , defection dominates, the public resource is overexploited and the population density declines. Consequently, interactions occur in smaller groups and returns are split among fewer individuals. For sufficiently small groups,  $S < r$ , cooperation becomes favourable again, the population density recovers,  $S$  increases and the cycle continues.

## References

1. Hauert C, Yuichiro Wakano J, Doebeli M. Ecological Public Goods Games: cooperation and bifurcation. *Theoretical Population Biology*. 2008;73:257–263.
