# Supplementary material for: Directed migration shapes cooperation in spatial ecological public goods games
Source: PubMed Central journal article supplement (PMC6687102; doi:10.1371/journal.pcbi.1006948), 2019-08-08
Supplement: pcbi.1006948.s002.pdf [file pcbi.1006948.s002.pdf]

## Derivation of Directed Migration Terms

The directed migration terms  $\mp K \nabla \cdot (w \phi \nabla \psi)$  can be derived as the continuum limit of an intuitive difference equation. For simplicity and accessibility we restrict the detailed derivation to a single spatial dimension with periodic boundary conditions and then outline extensions to higher dimensions.

### Difference Equation

Let  $\phi_f^t$  be the normalized density of strategy  $\phi$  at time  $t$  found at focal site  $f$ . The attraction of strategy  $\phi = u$  (or  $v$ ) to cooperators  $u$  is determined by:

- (i) If the cooperator density  $u_f^t$  at the focal site  $f$  is higher than at adjacent sites  $u_{f\pm h}^t$ , a proportion of type  $\phi_{f\pm h}^t$  migrates to the focal site. This migration is moderated by the reproductive opportunities at the focal site,  $w_f^t$ .
- (ii) Conversely, if densities of cooperators are higher at adjacent sites  $u_{f\pm h}^t$ , a proportion of type  $\phi_f^t$  migrates from the focal site to the adjacent site(s), again subject to the respective reproductive opportunities  $w_{f\pm h}^t$ .
- (iii) The sensitivity to density differences may be different for cooperators and defectors. The parameters  $A_C$  and  $A_D$  determine their respective migration rate.

The difference in cooperator densities at the focal and adjacent sites determines the direction of the flux of strategy  $\phi_f^t$  at the focal site  $f$ . This conditionality is conveniently captured by the indicator  $\mathbf{1}_{\{a < b\}}$ , which evaluates to 1 if  $a < b$  and to 0 otherwise. Thus, the net migration for strategy  $\phi_f^t$  at the focal site between time  $t$  and  $t + \Delta t$  due to attraction to cooperators is given by:

$$\frac{\phi_f^{t+\Delta t} - \phi_f^t}{\Delta t} = A \cdot \left( \sum_{i \in \{f+h, f-h\}} (u_f^t - u_i^t) \cdot \left( \mathbf{1}_{\{u_f^t < u_i^t\}} w_i^t \phi_f^t + \mathbf{1}_{\{u_f^t \geq u_i^t\}} w_f^t \phi_i^t \right) \right), \quad (\text{S1.1})$$

where  $A$  refers to the strength of attraction with  $A = A_C$  for  $\phi = u$  and  $A = A_D$  for  $\phi = v$ , respectively. An analogous argument yields the net migration due to the repulsion from defectors:

$$\frac{\phi_f^{t+\Delta t} - \phi_f^t}{\Delta t} = -R \cdot \left( \sum_{i \in \{f+h, f-h\}} (v_f^t - v_i^t) \cdot \left( \mathbf{1}_{\{u_f^t < u_i^t\}} w_i^t \phi_f^t + \mathbf{1}_{\{u_f^t \geq u_i^t\}} w_f^t \phi_i^t \right) \right), \quad (\text{S1.2})$$

where  $R$  indicates the strength of repulsion with  $R = R_C$  for  $\phi = u$  and  $R = R_D$  for  $\phi = v$ , respectively.

## Continuum Limit

In the continuum limit we let the spatial distance between adjacent sites,  $h$ , and the time increment,  $\Delta t$ , approach zero. Hence,  $h$  and  $\Delta t$  refer to infinitesimally small quantities. Let us first focus on the right hand side of Eq. (S1.1). Taylor expansion yields

$$u_{f \pm h} \approx u_f \pm h \cdot u'_f + h^2/2 \cdot u''_f,$$

$$\phi_{f \pm h} \approx \phi_f \pm h \cdot \phi'_f,$$

$$w_{f \pm h} \approx w_f \pm h \cdot w'_f$$

where 's indicate spatial derivatives and the superscript  $t$  for the time has been omitted.

Using

$$u_f - u_{f \pm h} \approx h \cdot (\mp u'_f - h/2 \cdot u''_f),$$

$$w_{f \pm h} \phi_f \approx w_f \phi_f \pm h w'_f \phi_f,$$

$$w_f \phi_{f \pm h} \approx w_f \phi_f \pm h w_f \phi'_f,$$

the summation in Eq. (S1.1) runs over

$$h \cdot (\mp u'_f - h/2 \cdot u''_f) \cdot \left( \mathbf{1}_{\{u_f < u_{f \pm h}\}} (w_f \phi_f \pm h w'_f \phi_f) + \mathbf{1}_{\{u_f \geq u_{f \pm h}\}} (w_f \phi_f \pm h w_f \phi'_f) \right).$$

Note that  $w_f \phi_f$  appears in the two complementary indicators and hence simplifies to

$$\mp h u'_f w_f \phi_f - h^2 \cdot \left( \frac{1}{2} u''_f w_f \phi_f + \mathbf{1}_{\{u_f < u_{f \pm h}\}} u'_f w'_f \phi_f + \mathbf{1}_{\{u_f \geq u_{f \pm h}\}} u'_f w_f \phi'_f \right).$$

Adding contributions from  $f \pm h$  cancels terms of order  $h$  and yields

$$-h^2 \cdot \left( u''_f w_f \phi_f + u'_f \cdot \sum_{i \in \{f+h, f-h\}} \mathbf{1}_{\{u_f < u_i\}} w'_f \phi_f + \mathbf{1}_{\{u_f \geq u_i\}} w_f \phi'_f \right). \quad (\text{S1.3})$$

Note that the terms in parentheses in Eq. (S1.3) resemble

$$u''_f w_f \phi_f + u'_f (w'_f \phi_f + w_f \phi'_f) = (w_f \phi_f u'_f)' \text{ when disregarding the sum and indicators. If}$$

$u_f$  is on a slope, e.g.  $u_{f-h} < u_f < u_{f+h}$  it is easy to see that equality holds. However,

if the cooperator density is at a local maximum or minimum at the focal site  $f$ , i.e.

$u_{f-h} < u_f > u_{f+h}$  or  $u_{f-h} > u_f < u_{f+h}$ , then one of the terms  $w'_f \phi_f$  or  $w_f \phi'_f$  cancels

while the other is doubled. Nevertheless the resulting error is negligible because both

terms are multiplied by  $u'_f$  which is  $\approx 0$  in the vicinity of an extremum.

~~Using Taylor expansion of the left hand side of Eq. (S1.1),  $\phi_f^{t+\Delta t} - \phi_f^t \approx \Delta t \partial_t \phi_f$  and an analogous calculation for Eq. (S1.2) yields~~  
The continuum limit,  $\Delta t, h \rightarrow 0$  with  $h^2/\Delta t \rightarrow 1$ , of Eqs. (S1.1) and (S1.2) yields the dynamical equations just based on directed migration:

$$\partial_t \phi = -A \partial_x (\phi w \cdot \partial_x u), \quad (\text{S1.4a})$$

$$\partial_t \phi = +R \partial_x (\phi w \cdot \partial_x v), \quad (\text{S1.4b})$$

~~in the limit  $h \rightarrow 0$  and  $\Delta t \rightarrow 0$  with  $h^2/\Delta t \rightarrow 1$ .~~

In higher spatial dimensions the above derivation applies to each spatial dimension separately and yields

$$\partial_t \phi = \mp K (\partial_x (\phi w \partial_x \psi) + \partial_y (\phi w \partial_y \psi)) = \mp K \nabla \cdot (\phi w \nabla \psi) \quad (\text{S1.5})$$

for two dimensions.
